# Supplementary material for: Altered Gene Expression Associated with microRNA Binding Site Polymorphisms
Source: PLoS One. 2015 Oct 23;10(10):e0141351. doi: 10.1371/journal.pone.0141351 (PMC4619707; doi:10.1371/journal.pone.0141351)
Supplement: S1 Table — Eleven samples from five separate studies were downloaded from Gene Expression Omnibus and analyzed with sRNABench v0.9. (XLSX) [file pone.0141351.s011.xlsx]

## Sheet: Leht 1
Study	Sample description	GEO accession	Tissue	Technology
Age-related changes in microRNA levels in serum	30 yr old individual	GSM1293571	PBMC cells	Illumina Genome Analyzer II
	64 yr old individual	GSM1293572	PBMC cells	Illumina Genome Analyzer II
Comprehensive microRNA profiling in B-cells of human centenarians by massively parallel sequencing	Young control individual 1	GSM804340	Immortalized B-cells	Illumina Genome Analyzer II
	Young control individual 2	GSM804341	Immortalized B-cells	Illumina Genome Analyzer II
	Young control individual 3	GSM804342	Immortalized B-cells	Illumina Genome Analyzer II
Analysis of microRNA transcriptome by deep sequencing of small RNA libraries of peripheral blood	Normal control individual 1	GSM494809	PBMC cells	Illumina Genome Analyzer
	Normal control individual 2	GSM494810	PBMC cells	Illumina Genome Analyzer
MiR-27a-3p in peripheral blood mononuclear cells as a potential marker for pancreatic cancer screening	Healthy individual	GSM925877	PBMC cells	Illumina HiSeq 2000
Deep sequencing of the small RNA transcriptome of blood leukocytes from Parkinson's disease patients prior to and following deep brain stimulation (DBS) and as compared with healthy control volunteers	Healthy individual	GSM1015762	Blood leukocytes	AB SOLiD System 3.0
	Healthy individual	GSM1015763	Blood leukocytes	AB SOLiD System 3.0
	Healthy individual	GSM1015764	Blood leukocytes	AB SOLiD System 3.0
